# Supplementary material
Source: PubMed Central journal article supplement (PMC4624156)
Supplement: mmc1.pdf [file mmc1.pdf]

## **Supplemental Material**

### **Structural Basis for the Inhibition of Gas Hydrates by Alpha-helical Antifreeze Proteins**

Tianjun Sun<sup>†</sup>, Peter L. Davies<sup>†,‡</sup> and Virginia K. Walker<sup>\*†,‡</sup>

<sup>†</sup>Department of Biomedical and Molecular Sciences, Queen's University, Kingston,  
Ontario, Canada

<sup>‡</sup>Department of Biology, Queen's University, Kingston, Ontario, Canada

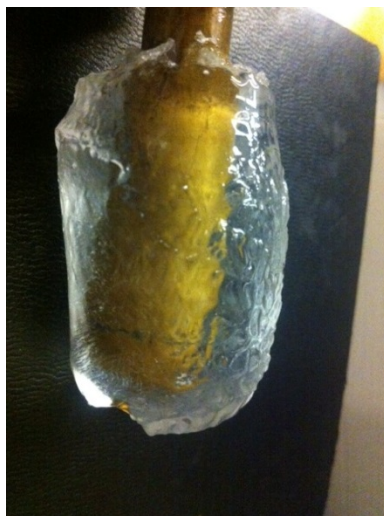

**Figure S1.** The polycrystalline THF crystal grown in the presence of 4  $\mu\text{M}$  PVP.
